# Supplementary material for: Development and validation of a candidate reference measurement procedure for free triiodothyronine and free thyroxine in human serum using equilibrium dialysis isotope-dilution liquid chromatography-tandem mass spectrometry
Source: publisher site journal article supplement (doi:10.1515/cclm-2025-0874), 2025-12-17
Supplement: Supplementary file 1 [file j_cclm-2025-0874_suppl_001.docx]

**Supplementary material**

**Development and validation of a candidate reference measurement procedure for free triiodothyronine and free thyroxine in human serum using equilibrium dialysis Isotope-Dilution Liquid Chromatography-Tandem Mass Spectrometry**

**Short title:** A cRMP for serum FT3 and FT4 using ID-LC-MS/MS

Min Zhan, Qiaoxuan Zhang, Zijia Ma, Liqiao Han, Jun Yan, Guangya Zheng, Wenxi Zhou, Weiyan Zhou*, Xianzhang Huang*

*** Corresponding author: Weiyan Zhou, Xianzhang Huang**

Weiyan Zhou, National Center for Clinical Laboratories, Institute of Geriatric Medicine, Chinese Academy of Medical Sciences, Beijing Hospital/National Center of Gerontology, No. 1, Dahua Road, Dongcheng District, Beijing 100730, PR China. E-mail: [wyzhou@nccl.org.cn](mailto:wyzhou@nccl.org.cn)

Xianzhang Huang, The Second Affiliated Hospital of Guangzhou University of Chinese Medicine, Guangzhou, China, Phone: +020 81887233 35264, E-mail: [huangxz020@gzucm.edu.cn](mailto:huangxz020@gzucm.edu.cn).

Min Zhan and Qiaoxuan Zhang contributed equally to this work.

**Min Zhan, Qiaoxuan Zhang, Liqiao Han, Jun Yan, Xianzhang Huang:** 1. Department of Laboratory Medicine, The Second Affiliated Hospital of Guangzhou University of Chinese Medicine, Guangzhou, China. 2. Guangdong Provincial Clinical Research Center for Laboratory Medicine, Guangzhou, China.

**Zijia Ma:** 1. National Center for Clinical Laboratories, Institute of Geriatric Medicine, Chinese Academy of Medical Sciences, Beijing Hospital/National Center of Gerontology, P.R. China. 2. Chinese Academy of Medical Sciences and Peking Union Medical College, Beijing, P.R. China.

**Guangya Zheng, Wenxi Zhou:** Shenzhen New Industries Biomedical Engineering Co., Ltd. (Briefed as Snibe Co.,Ltd.), Shenzhen, China

**Weiyan Zhou:** National Center for Clinical Laboratories, Institute of Geriatric Medicine, Chinese Academy of Medical Sciences, Beijing Hospital/National Center of Gerontology, P.R. China

Supplementary material: 1 document /6 tables /3 figures

**Preparation of calibrators and quality control samples**

All volumetric steps were gravimetrically controlled using an analytical balance. Since T3 and T4 powder was difficult to dissolve, an acidified methanol solution (methanol: 1 mol/L HCl = 99:1, v/v) was used to dissolve the primary reference material. Alkalized methanol (1.7% ammonium hydroxide, 0.26 mol/L NH3 in ethanol) was then used to prepare the stock, intermediate, working solutions, and calibrators. About 2 mL of acidified methanol was accurately weighed, and the primary reference material was dissolved in ampoules. Then, 150 μL of the dissolved sample was added to 40 mL of alkalized methanol to prepare a stock solution of approximately 143 μg/g. Following this, the solution was gradually diluted to create an intermediate solution (534 ng/g) and a working solution (2 ng/g). Finally, six calibrators were prepared by adding different volumes of the working solution to six centrifuge tubes, followed by equal amounts of alkalized methanol. The internal standard solution was prepared in the same way, with a concentration of approximately 200 pg/g. Concentrations and matrices of each solution are summarized in Supplemental Table S1. Before each experiment, 1 mL of each calibrator (1-6) was transferred into 2 mL centrifuge tubes and weighed accurately. Then, 150 μL of the internal standard solution was added by gravimetry. After mixing and equilibrating for 1 h, the calibrators (1-6) were dried under nitrogen at 45°C. Before they were injected into the LC-MS/MS system, the calibrators were reconstituted in 50 μL methanol/water (45:55, v/v).

**Supplemental Table S1**: Summary of calibrator solution concentrations and matrixes

| Solution | T3 Approximate concentration | T4 Approximate concentration | Matrix |
| --- | --- | --- | --- |
| stock solution | 152.9 ug/g | 96.96 μg/g | 1.7% ammonium hydroxide in methanol |
| Intermediate solution | 0.9438 ug/g | 1.981 μg/g | 1.7% ammonium hydroxide in methanol |
| Working solution | 2.352 ng/g | 4.957 ng/g | 1.7% ammonium hydroxide in methanol |
| Calibrator 7 | / | 149.5 pg/g | 1.7% ammonium hydroxide in methanol |
| Calibrator 6 | 29.23 pg/g | 100.9 pg/g | 1.7% ammonium hydroxide in methanol |
| Calibrator 5 | 15.38 pg/g | 50.48 pg/g | 1.7% ammonium hydroxide in methanol |
| Calibrator 4 | 9.90 pg/g | 25.68 pg/g | 1.7% ammonium hydroxide in methanol |
| Calibrator 3 | 5.25 pg/g | 9.997 pg/g | 1.7% ammonium hydroxide in methanol |
| Calibrator 2 | 2.50 pg/g | 4.953 pg/g | 1.7% ammonium hydroxide in methanol |
| Calibrator 1 | 1.30 pg/g | 2.466 pg/g | 1.7% ammonium hydroxide in methanol |
| internal standard solution | 200 pg/g | 200 pg/g | 1.7% ammonium hydroxide in methanol |

**Dialysate preparation**

A pH adjusting buffer containing 776 mmol/L HEPES was prepared by dissolving 9.25 g of HEPES and 0.44 g of sodium hydroxide in 50 mL of ultrapure water. HEPES dialysis buffer was prepared by dissolving 2.51 g of HEPES, 180 mg of sodium chloride, 1.07g of sodium chloride, 44.90 mg of potassium phosphate, 39.76 mg of potassium chloride, 55.22 mg of magnesium sulfate heptahydrate, and 60.06 mg of urea in 200 mL of ultrapure water, followed by the addition of 104.0 mg of sodium azide and 55.86 mg of calcium chloride dihydrate. The pH of HEPES dialysis buffer and pH adjusting buffer were measured using pH meter adjusted to pH 7.4 ± 0.03 at 37ºC with 8 mol/L NaOH or 2mol/L HCl.

**Supplemental Table S2:** Dialysis buffer formulation and quality specifications

| **0.776 M HEPES buffer** | | **mW**  **（g/mol）** | **Mass concentration**  **(g/L)** | **Quality**  **(g/50mL)** |
| --- | --- | --- | --- | --- |
| 0.776 mol/L | N-(2-hydroxyethyl)piperazine-N9  -(2-ethylsulfonic acid) (HEPES) | 238.3 | 184.9 | 9.25 |
| 0.220 mol/L | sodium hydroxide | 40.0 | 8.80 | 0.44 |
| **52.75 mM HEPES buffer** | | **mW**  **(g/mol)** | **Mass concentration**  **(g/L)** | **Quality**  **(mg/200mL)** |
| 52.75 mmol/L | HEPES | 238.3 | 12.57 | 2510 |
| 22.5 mmol/L | sodium hydroxide | 40.00 | 0.900 | 180.0 |
| 91.6 mmol/L | sodium chloride | 58.44 | 5.353 | 1070 |
| 1.65 mmol/L | potassium phosphate | 136.1 | 0.2245 | 44.90 |
| 2.68 mmol/L | potassium chloride | 74.55 | 0.1997 | 39.76 |
| 1.12 mmol/L | magnesium sulfate heptahydrate | 246.5 | 0.2760 | 55.22 |
| 5.00 mmol/L | urea | 60.06 | 0.3003 | 60.06 |
| 1.90 mmol/L | calcium chloride dihydrate | 147.0 | 0.2793 | 55.86 |
| 8.00 mmol/L | sodium azide | 65.01 | 0.5201 | 104.0 |

**Extracted by SPE**

Solid phase extraction is done on Waters (Milford, MA, USA) Sep-Pak C18 1 cc cartridges. Prior to use, the cartridges are pre-conditioned by wetting consecutively with 3 mL methanol. And adding 4 mL of 0.1% (v/v) trifluoroacetic acid (TFA) in water to cartridges for equilibration, ensuring the bed remained wet before sample loading. After equilibration, the dialysate/internal standard mixture were loaded onto C18 SPE cartridges, eluates were collected, then eluates were passed through the cartridges a second time to maximize recovery. SPE cartridges were washed with 3 mL 5% (v/v) methanol in water with 0.1% (v/v) TFA. FT3 and FT4 was eluted twice with 500 μL 80% methanol in water with 0.1% (v/v) TFA. The eluate is evaporated to dryness under N2 at 45°C, and the residue was resuspended in 50 μL of 45% (v/v) methanol in water. Finally, 10 μL of the resuspended sample was injected into the LC-MS/MS system for analysis.

**Laboratory of Snibe-LC-MS/MS conditions**

The LC-MS/MS analysis in this study was performed using a UPLC system (Waters, Milford, Massachusetts, USA) coupled with a Waters Xevo TQ-Absolute triple quadrupole mass spectrometer. The UPLC separation was carried out on a C18 column at 40°C. The autosampler temperature was maintained at 10°C, with an injection volume of 20 μL. Gradient elution is done by mixing phase A (0.1% formic acid in water) and phase B (0.1% FA in methanol). Positive electrospray ionization (ESI) mode and multiple reaction monitoring (MRM) were employed for mass spectrometry. Details of the LC procedure are summarized in Supplementary Table S3.

**Supplementary Table S3:** Details of the LC-MS/MS conditions used for FT3 and FT4 analysis at the laboratory of Snibe

| LC procedure  UPLC system: Waters ACQUITY UPLC I-Class PLUS | | | | | | |
| --- | --- | --- | --- | --- | --- | --- |
| BEH C18, 2.1 × 50 mm, 1.7 μm (Waters ACQUITY UPLC®) | | | | | | |
| Time (min) | Flow rate, mL/min | | %A | %B | | Curve |
| 0 | 0.3 | | 50 | 50 | | / |
| 0.5 | 0.3 | | 50 | 50 | | Linear Gradient |
| 3 | 0.3 | | 25 | 75 | | Linear Gradient |
| 4 | 0.3 | | 5 | 95 | | Linear Gradient |
| 5 | 0.3 | | 5 | 95 | | Hold |
| 6 | 0.3 | | 50 | 50 | | Linear Gradient |
| MS/MS-settings | | | | | | |
| MS system: Xevo TQ-Absolute triple quadrupole mass spectrometer (Waters) | | | | | | |
| Ionization mode | | | Positive electrospray | | | |
| Capillary (kV) | | | 1.0 | | | |
| Cone (V) | | | 25 | | | |
| Source temperature (℃) | | | 150 | | | |
| Desolvation temperature (℃) | | | 600 | | | |
| Cone gas flow (L/h) | | | 1200 | | | |
| Collision gas flow (mL/min) | | | 0.15 | | | |
| Nebulizer pressure (bar) | | | 7 | | | |
| **Compound name** | | **Parent (m/z)** | **Daughter (m/z)** | | **Collision (V)** | |
| T3a | | 651.8 | 605.4 | | 23 | |
| T3b | | 651.8 | 507.6 | | 20 | |
| T3-13C6a | | 657.8 | 611.8 | | 22 | |
| T3-13C6b | | 657.8 | 513.7 | | 23 | |
| T4a | | 777.6 | 731.4 | | 25 | |
| T4b | | 777.6 | 633.5 | | 20 | |
| T4-13C6a | | 783.7 | 737.4 | | 25 | |
| T4-13C6b | | 783.7 | 639.5 | | 20 | |
| aQuantitation Ion; bConfirmation Ion | | | | | | |

**Chemical Structure and Ionization Pathways of T3 and T4 in Positive ESI-MS/MS**

The suggested fragmentation mechanisms for T3, T4, T3-13C6 and T4-13C6 are illustrated in Supplemental Figure S1-A. The full scan mass spectrum for T3 detection utilizes the quantitative transition m/z 652.0/606.0, while the labeled T3-13C6 employs the transition m/z 658.0/612.0. Similarly, the mass spectrum for T4 detection is based on the transition m/z 777.7/731.6, with the labeled T4-13C6 using the transition m/z 783.7/737.9 (Supplemental Figure S1-B). The representative chromatogram of labeled and unlabeled FT3 and FT4 in the serum samples (Supplemental Figure S1-C).


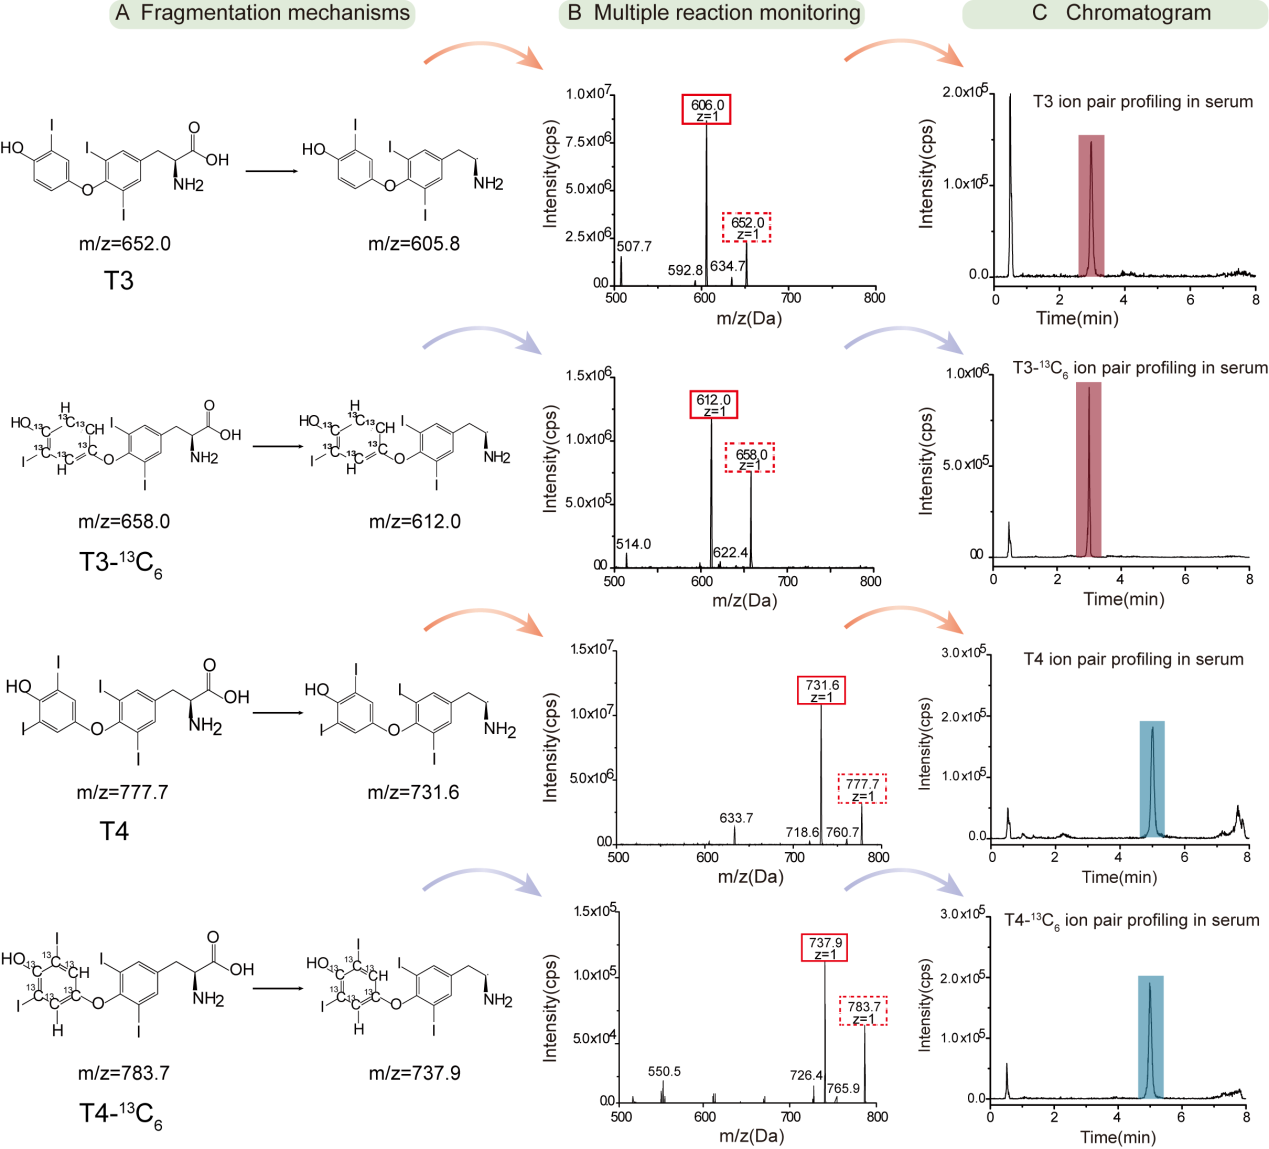


**Supplemental Figure S1:** LC-MS/MS analysis for T3 and T4. (A) The proposed structure of the major fragments ions for T3, T3-13C6, T4, and T4-13C6. (B) Spectra of parental ions and their product ions as a result of collisional activation of T3, T3-13C6, T4 and T4-13C6. (C) Representative chromatogram

**Method validation-Sensitivity**

The LoD for FT3 and FT4, set at S/N>3, was determined to be 0.77 pmol/L and 1.61 pmol/L, respectively. The LoQ, set at S/N>10 with CV%>10.0%, was determined to be 1.54 pmol/L and 3.22 pmol/L for FT3 and FT4, respectively, see Supplementary Figure S2.


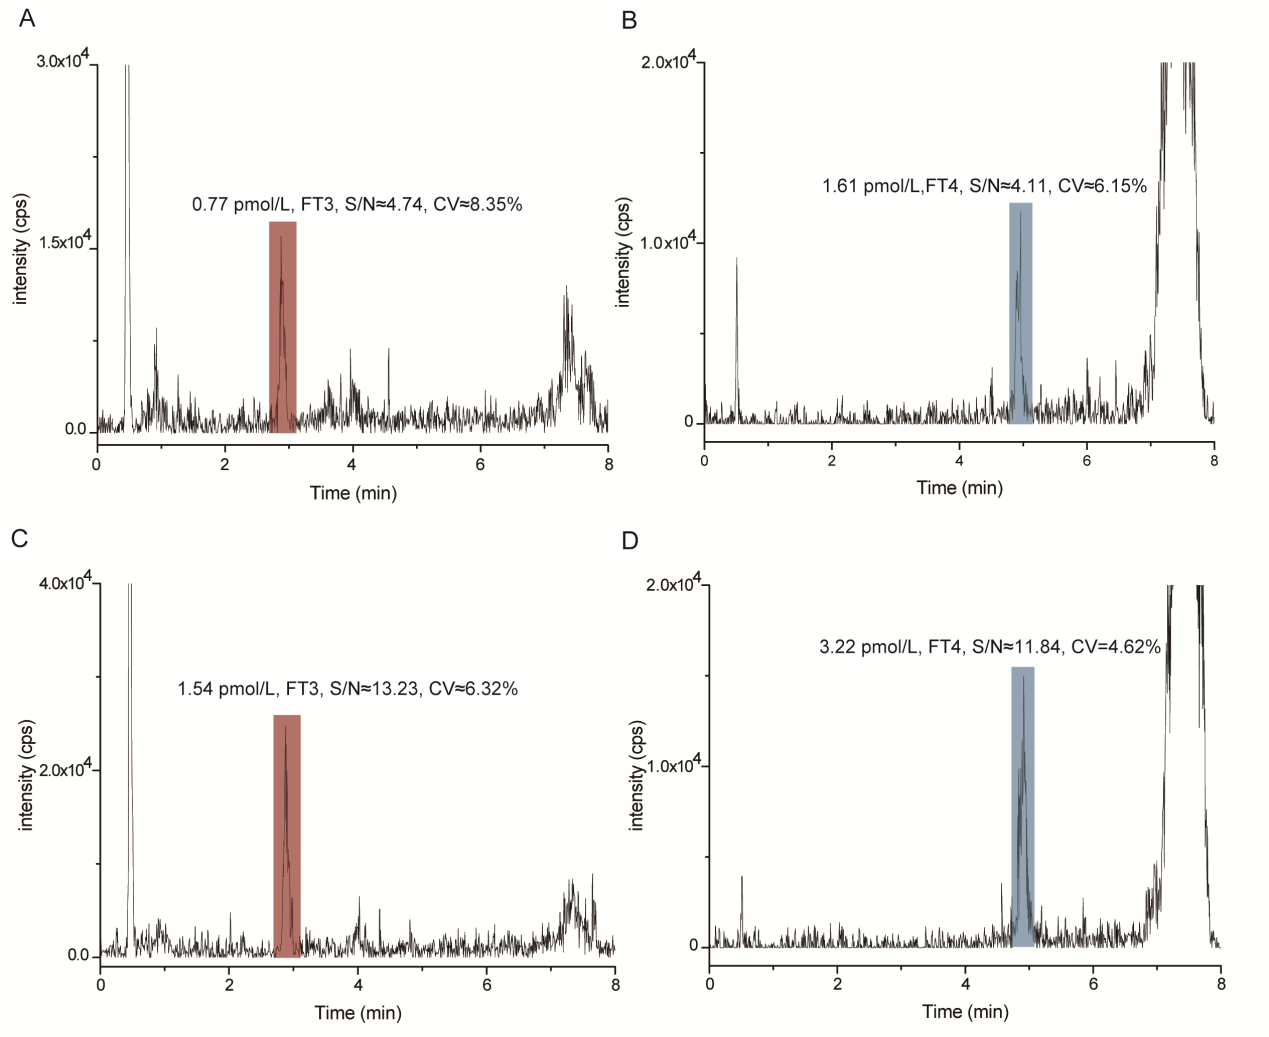


**Supplementary Figure S2**: Representative chromatograms detected in the LC-MS/MS system of LoD and LoQ for FT3 and FT4

**
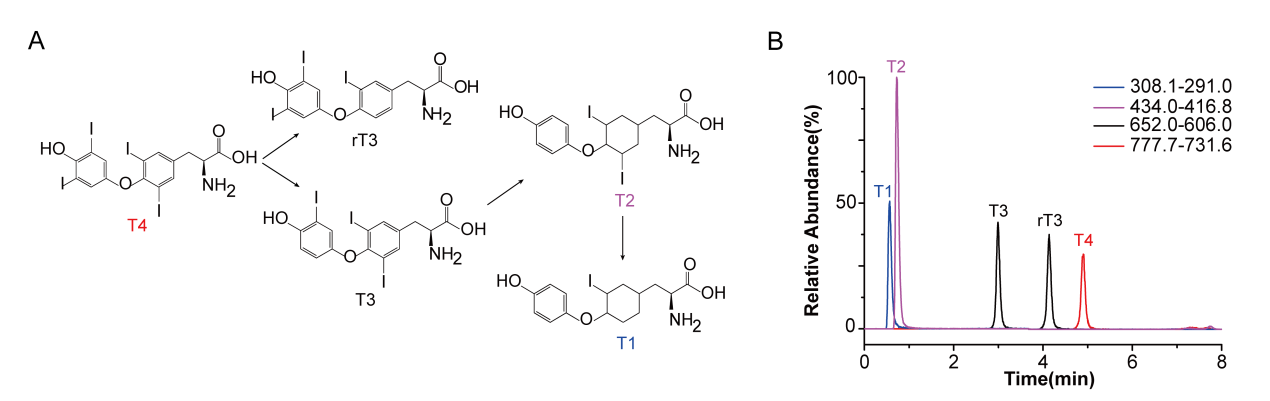
**

**Supplementary Figure S3:** Structure and chromatogram of the thyroid hormones. (A) Structure of the thyroid hormones. (B) Chromatogram of thyroid hormones in spiked dialysis buffer.

**Supplemental Table S4**: Ion suppression effects evaluation of FT3 and FT4 throughout their respective chromatographic peaks

| **Sample Name** | **Analyte Peak Area (counts)** | **Average** | **Mean Ion suppression Effect** | **difference** |
| --- | --- | --- | --- | --- |
| 20 pg/mL T3 | 2403.372 | 2448.19 | 100.9% | 0.90% |
| 2456.311 |
| 2484.883 |
| 20pg/mL T3+Postcolumn infusion of T3-13C6 (10 ng/mL) | 2439.029 | 2470.13 |
| 2432.335 |
| 2539.029 |
| 50 pg/mL T4 | 4700.721 | 4729.92 | 99.4% | -0.59% |
| 4783.773 |
| 4705.265 |
| 50 pg/mL T4+Postcolumn infusion of T4-13C6 (10 ng/mL) | 4619.672 | 4702.19 |
| 4756.949 |
| 4729.949 |

**Supplemental Table S5:** Measurement Uncertainty of the FT3 and FT4 cRMP

|  | Serum-based QCs for FT3 | | | Serum-based QCs for FT4 | | | | |
| --- | --- | --- | --- | --- | --- | --- | --- | --- |
|  | Low | Medium | High | | Low | Medium | High |
| Concentration (pmol/L) | 5.29 | 7.69 | 27.2 | | 15.5 | 27.1 | 102 |
| N | 15 | 15 | 15 | | 15 | 15 | 15 |
| Relative Standard Uncertainty,  Type A (%CV) | 3.5 | 3.5 | 3.5 | | 3.7 | 3.7 | 3.7 |
| Relative Standard Uncertainty,  Type B (%CV) | 1.1 | 1.4 | 1.3 | | 1.5 | 1.6 | 1.3 |
| Combined Relative Standard Uncertainty, % | 3.7 | 3.8 | 3.7 | | 4.0 | 4.0 | 3.9 |
| Coverage Factor | 2 | 2 | 2 | | 2 | 2 | 2 |
| Relative Expanded Uncertainty  (95% Confidence Interval) | 7.4 | 7.5 | 7.5 | | 8.0 | 8.0 | 7.8 |

**Supplementary Table S6**: Comparison with the acknowledges by the JCTLM of FT4 RMPs, published cRMPs and our lab cRMP

| **Items** | **RMPs acknowledges by the JCTLM** | | **Published cRMPs** | | **Our lab cRMP** | |
| --- | --- | --- | --- | --- | --- | --- |
| **University of Ghent RMP** | **CDC equilibrium dialysis lD LC-MS/MS RMP** | Heleen I Jansen et al, cRMP | Linda M. Thienpont et al, cRMP |
| JCTLM DB Identifier | C8RMP1 | C17RMP4 | **/** | | | |
| Detection object | FT4 | FT4 | FT4 | FT4 and procedure extended to FT3 | FT4 | FT3 |
| Full description of technique(s) | Equilibrium dialysis ID LC-MS/MS | | | | | |
| Reference | [*Clin. Chem. Lab. Med.*, 2011, 49(8), 1275 - 1281](http://dx.doi.org/10.1515/CCLM.2011.639) | [*Clinical Biochemistry* 2023 116:42-51](https://doi.org/10.1016/j.clinbiochem.2023.03.010) | [*Clin. Chem. Lab. Med.*, 2023, 61(9), 1605 - 1611](https://doi.org/10.1515/cclm-2022-1134) | [*Clinical Chemistry, 2010, 56(6): 912–920*](https://academic.oup.com/clinchem/article/56/6/912/5622418?login=true) | / | |
| Dialysis Device | Multi-Equilibrium dialyser System equipped with ‘Micro 1’ dialysis cells (Dianorm G. Maierhofer GmbH, Munchen, Germany) | Micro-Equilibrium Dialyzer System, consisting of 1 mL PTFE dialysis cells, cell racks and spacers, cell stoppers and emptying plugs was obtained from Harvard Apparatus (Holliston, MA) | Dianorm® Equilibrium dialyser | equilibrium dialyser (from Dianorm) | Fast Micro-Equilibrium Dialyzer (7416-15005D) was obtained from Harvard Apparatus (Massachusetts, USA) | |
| Dialysis process temperature control | in a water bath with constant agitation by a rotating apparatus at 37.0 ± 0.5 ºC | ontinuously rotated in a convection oven at 37.0 ±0.5 ºC | in a water bath at 37 ± 0.5 °C and continually rotated | in a water bath at 37 ± 0.2 °C and continually rotated | placed in a temperature-controlled incubator set at 37.0 ± 0.5°C | |
| Membrane cut-off | 5 kDa | 5 kDa | 5 kDa | 5 kDa | 10 kDa | |
| Dialysis time | 4 h | 4h | 4 h | 4 h | 6h | |
| Total run time of LC-MS/MS | 15 min | 12 min | 15 min | 12 min | 8 min | |
| Applicable range | 1.8 pmol/L to 79.8 pmol/L | 1.29 pmol/L to 258 pmol/L | 1.0–113 pmol/L | / | 3.22 ~ 193 pmol/L | 1.54 ~ 46.1 pmol/L |
| Imprecision (%CV) | 2.4%~3.7% | 2.1%~4.4% | 2.6%~3.9% | 3.7%~5.6% for FT4 | 2.1%~3.0% | 1.8%~2.4% |
| LoD (LoQ) | 0.5 pmol/L (1.3 pmol/L) | 0.9 pmol/L (1.6 pmol/L) | 0.39 pmol/L  (1.39 pmol/L) | 0.5 pmol/L (1.3 pmol/L) for FT4 | 1.61 pmol/L  (3.22 pmol/L) | 0.77 pmol/L  (1.54 pmol/L) |
